# Supplementary material for: New Insight Into Avian Papillomavirus Ecology and Evolution From Characterization of Novel Wild Bird Papillomaviruses
Source: Front Microbiol. 2019 Apr 12;10:701. doi: 10.3389/fmicb.2019.00701 (PMC6473165; doi:10.3389/fmicb.2019.00701)
Supplement: Supplementary file 2 [file Table_1.XLSX]

## Sheet: APV features
Virus			Host		Clinical signs	Location	LCR				Non-coding 2		E6		E7			E1				E2		E9	L2					L1
Type	Genus	Accession number	Species	Order			TATA box	polyA	E2BS (N)	Atypical E2BS (N)	Length	polyA	Size (aa)	Zn binding domain	Size (aa)	pRB binding	Zn binding domain	Size (aa)	Walker A	Walker B	Walker C	Size	DNA binding domain	Size	Size	furin cleavage	TM domain	Sortin Nexin binding	Syntaxin 18 binding	size
							TATAWAW	AWTAAA	ACCNNNNNNGGT	ACCNNNNGGT		AWTAAA		CXXC---CXXC		LXCXE	CXXC---CXXC		GXXXXGK[T/S]	ΦΦDD	Φ[T/S][T/S]N		GXTXQXKTIRXR			RX[K/R]R	GXXXG	[F/Y]XNPX[F/Y]	DQ/KILQ/K
FcPV-1	Etapapillomavirus	NC_004068	Fringilla coelebs	Passeriformes	cutaneous tumor	skin	yes	yes	/	/	50 nt	no	84	aa 28-77	237	aa 161-165	aa 198-226	694	aa 511-518	aa 554-557	aa 598-601	399	aa 327-338	199	505	aa 45-48	aa 88-103	aa 154-159	/	506
PePV-1	Thetapapillomavirus	NC_003973	Psittacus erithacus timneh	Psittaciformes	cutaneous tumor	skin	yes	yes	1	2	2 nt	no	E6 absent		177	aa 103-107	aa 134-164	678	11 507-514	aa 550-553	aa 594-597	372	aa 301-312	195	547	aa 51-54	aa 98-113	aa 185-190	aa 84-88	520
FgPV-1	Treiszeta	NC_024300	Fulmarus glacialis	Plocerraliformes	cutaneous tumor	skin	yes	yes	/	/	/	no	82	/	119	aa 33-37	aa 81-104	587	aa 420-427	aa 463-466	aa 507-510	412	aa 338-349	absent	533	aa 44-47	aa 91-95	/	/	486
Gf-PV-1	Undetermined	MF581781	Gyps fulvus	Accipitriformes	cutaneous tumor	skin	unknown	unknown	unknown	unknown	unknown	unknown	unknown	unknown	unknown	unknown	unknown	unknown	unknown	unknown	unknown	unknown	unknown	unknown	unknown	unknown	unknown	unknown	unknown	unknown
FlPV-1	Dyoepsilonpapillomavirus	NC_013117	Francolinus leucoscepus	Galliformes	unknown	skin	yes	yes	/	5	1 nt	no	82	aa 27-75	132	aa 51-55	aa 88-118	658	aa 475-482	aa 518-521	aa 462-565	360	aa 288-299	143	565	aa 45-48	aa 88-92	/	/	523
PaPV-1	Treisepsilon	NC_023894	Pygoscelis adeliae	Sphenisciformes	unknown	fecal	yes	yes	/	7	6 nt	yes	96	aa 25-74	163	aa 59-63	aa 123-153	676	aa 507-514	aa 550-553	aa 594-597	393	aa 321-332	171	558	aa 45-48	aa 93-101	aa 163-168	/	507
PaPV-2	Treisepsilon	MF168943	Pygoscelis adeliae	Sphenisciformes	unknown	cloacal	yes	yes	2	2	5 nt	no	99	aa 22-68	161	aa 59-63	aa 118-148	690	aa 519-526	aa 562-565	aa 606-609	418	aa 345-356	170	560	aa 50-53	aa 93-106	aa 173-178	aa 84-88	512
DuPV-1	Undetermined	KX147683	Anas platyrhynchos	Anseriformes	unknown	gut	unknown	unknown	unknown	unknown	unknown	unknown	unknown	unknown	unknown	unknown	unknown	705	aa 517-524	aa 560-563	aa 604-607	unknown	unknown	unknown	522	/	aa 85-104	aa 167-172	/	unknown
DuPV-2	Undetermined	SAMN08706626	Anas platyrhynchos	Anseriformes	unknown	feces/cloacal	unknown	unknown	unknown	unknown	unknown	unknown	unknown	unknown	unknown	unknown	unknown	unknown	unknown	unknown	unknown	unknown	unknown	unknown	unknown	unknown	unknown	unknown	unknown	unknown
ScPV-1	Etapapillomavirus	MF564196	Serinus canaria	Passeriformes	unknown	tongue	no	yes	1	1	10 nt	no	83	aa 27-76	238	aa 83-87	aa 286-316	678	aa 503-510	aa 546-549	aa 590-593	398	aa 325-336	192	532	aa 45-48	aa 88-101	aa 163-168	/	501
DuPV-3	Undetermined	MK620303	Anas sp.	Anseriformes	unknown	oral and maybe cloacal	yes	yes	/	8	13 nt	no	84	aa 28-77	197	aa 70-74	aa 155-185	722	aa 537-544	aa 580-583	aa 524-627	411	aa 336-347	179	550	/	aa 84-97	aa 164-169	/	510
PuPV-1	Undetermined	MK620302	Fratercula arctica	Charadriiformes	unknown	unknown (cloacal/oral)	yes	no	/	2	9 nt	yes	81	aa 25-74	157	aa 63-67	aa 114-144	684	aa 511-518	aa 554-557	aa 598-601	396	aa 323-334	170	559	aa 43-46	aa 92-104	aa 170-175	/	509
GuPV-1	Undetermined	MK620304	Larus smithsonianus	Charadriiformes	unknown	unknown (cloacal/oral)	yes	yes	/	6	20 nt	yes	85	aa 25-74	153	aa 57-61	aa 109-139	687	aa 511-518	aa 554-557	aa 598-601	378	aa 305-316	185	561	aa 38-41	aa 86-96	aa 169-174	aa 72-76	513
GuPV-2	Undetermined	MK620329	Larus sp.	Charadriiformes	unknown	unknown (cloacal/oral)	yes	yes	/	5	unknown	unknown	unknown	unknown	unknown	unknown	unknown	unknown	unknown	unknown	unknown	unknown	unknown	unknown	unknown	unknown	unknown	unknown	unknown	513
Gu-PV-3	Undetermined	MK620331	Larus smithsonianus	Charadriiformes	unknown	unknown (cloacal/oral)	unknown	unknown	unknown	unknown	unknown	unknown	unknown	unknown	unknown	unknown	unknown	unknown	unknown	unknown	unknown	unknown	unknown	unknown	unknown	unknown	unknown	unknown	unknown	513
KiPV-1	Undetermined	MK620332	Rissa tridactyla	Charadriiformes	unknown	unknown (cloacal/oral)	yes	yes	/	9	unknown	unknown	81	aa 25-74	151	aa 52-56	aa 107-137	unknown	unknown	unknown	unknown	unknown	unknown	unknown	unknown	unknown	unknown	unknown	unknown	515
KiPV-2	Undetermined	MK620305	Rissa tridactyla	Charadriiformes	unknown	unknown (cloacal/oral)	yes	yes	1	9	4 nt	yes	81	aa 25-74	152	aa 53-57	aa 108-138	683	aa 505-512	aa 548-551	aa 593-595	418	aa 345-356	168	561	aa 43-46	aa 90-94	aa 171-176	/	515
KiPV-3	Undetermined	MK620334	Rissa tridactyla	Charadriiformes	unknown	unknown (cloacal/oral)	unknown	unknown	unknown	unknown	unknown	unknown	unknown	unknown	unknown	unknown	unknown	unknown	unknown	unknown	unknown	unknown	unknown	unknown	unknown	unknown	unknown	unknown	unknown	513
KiPV-4	Undetermined	MK620336	Rissa tridactyla	Charadriiformes	unknown	unknown (cloacal/oral)	unknown	unknown	unknown	unknown	unknown	unknown	unknown	unknown	unknown	unknown	unknown	unknown	unknown	unknown	unknown	unknown	unknown	unknown	unknown	unknown	unknown	unknown	unknown	unknown
KiPV-5	Undetermined	MK620339	Rissa tridactyla	Charadriiformes	unknown	unknown (cloacal/oral)	yes	yes	/	8	unknown	unknown	unknown	unknown	unknown	unknown	unknown	unknown	unknown	unknown	unknown	unknown	unknown	unknown	unknown	unknown	unknown	unknown	unknown	unknown
KiPV-6	Undetermined	MK620340	Rissa tridactyla	Charadriiformes	unknown	unknown (cloacal/oral)	unknown	unknown	unknown	unknown	unknown	unknown	unknown	unknown	unknown	unknown	unknown	unknown	unknown	unknown	unknown	unknown	unknown	unknown	unknown	unknown	unknown	unknown	unknown	511
KiPV-7	Undetermined	MK620341	Rissa tridactyla	Charadriiformes	unknown	unknown (cloacal/oral)	unknown	unknown	unknown	unknown	unknown	unknown	unknown	unknown	unknown	unknown	unknown	unknown	unknown	unknown	unknown	unknown	unknown	unknown	unknown	unknown	unknown	unknown	unknown	unknown

## Sheet: APV genetic identities
Average pairwise identities between L1 nucleotide sequences of all known APV genotypes.
Identities between viruses potentially belonging to the same genus are included in boxes and highlighted in blue, while those between viruses potentially belonging to the same species in green.
	DuPV-12	DuPV-24	DuPV-3	FlPV-1	ScPV-1	FcPV-1	PePV-1	GvPV-14	GuPV-1	GuPV-2	GuPV-3	KiPV-1	KiPV-2	KiPV-3	KiPV-41	KiPV-53	KiPV-6	KiPV-71	PuPV-1	PaPV-1	PaPV-2
DuPV-24	91.2
DuPV-3	74.4	74.1
FlPV-1	64.2	65.9	62.4
ScPV-1	61.8	63.9	61.6	56.1
FcPV-1	62.4	62.1	60.7	56.6	65.8
PePV-1	62.9	66.1	62.2	60.1	58.8	57
GvPV-14	65.4	63.8	62.9	59.4	56.1	57.6	64.6
GuPV-1	61.7	61.9	61.2	58.9	57.6	56.7	58.7	59.3
GuPV-2	62.3	60.2	59.9	59.8	57.9	56.4	58.7	61.3	84.1
GuPV-3	61.1	61.1	60.1	58.4	58.3	56.5	58.4	59.3	67.8	69.5
KiPV-1	62.1	63	60.3	58.2	57.3	57.5	58.9	60.5	68.9	68.6	73.7
KiPV-2	62.9	62	60.9	58.2	57.3	57.3	58.8	60.5	68.3	69.6	73.4	88.8
KiPV-3	62.1	64.6	61.1	57.5	56.1	55.9	58.8	60.9	68.4	69.1	72	85	85.4
KiPV-41	62.9	61.5	62.6	61.1	58.4	58.5	59.8	60.2	74.9	74.8	70.7	70.1	70.5	69.9
KiPV-53	62.5	NO	57.2	54.6	55.5	52.6	57.1	NO	64.7	66.1	72.7	66.5	68.6	68.4	69.3
KiPV-6	61.1	60.1	61.1	58.5	57.9	56.3	58.8	57.9	72	72.1	68.7	67.6	66.9	68.3	80	64.6
KiPV-71	60.4	62.8	62.1	58.6	57.5	56.6	59.8	59.6	67.6	68.4	68.6	68.2	68.5	68.1	68.3	67.9	67.3
PuPV-1	61.6	62.2	61.8	60.6	58.2	57.9	59.4	59.1	70.5	70.5	68.8	69.1	69.2	69.2	71.2	63.4	69.2	67.2
PaPV-1	60.5	60.8	62.1	60.6	56	55.6	57.7	62.1	61.1	61.4	62	60.6	60.9	60.2	62.2	58.6	59.7	59.2	63.1
PaPV-2	60.3	58.5	59.6	57.1	56.3	55.1	57.8	56.5	60.8	60.4	60.3	59.3	59.8	60	62.5	57.6	59.3	57.6	60.5	66.6
FgPV-1	52.5	60.8	51.3	50.6	52.3	51	51.6	54.1	51.4	51.3	51.1	51.2	51.6	50.8	50.6	48.8	51.1	50.9	51.8	51.5	52.2
1. ~85% of the whole L1
2. ~80% of the whole L1
3. ~55% of the whole L1
4. ~38% of the whole L1
NO: No Overlap
